# Supplementary material for: BILP-19—An Ultramicroporous Organic Network with Exceptional Carbon Dioxide Uptake
Source: PubMed Central journal article supplement (PMC6152267; doi:10.3390/molecules22081343), 2017-08-12
Supplement: molecules-22-01343-s001.pdf [file molecules-22-01343-s001.pdf]

## Supplementary Information towards:

# BILP-19 – An Ultramicroporous Organic Network with Exceptional Carbon Dioxide Uptake

Christoph Klumpen <sup>1</sup>, Florian Radakovitsch <sup>2</sup>, Andreas Jess <sup>2</sup> and Jürgen Senker <sup>1,\*</sup>

<sup>1</sup> Inorganic Chemistry III, University of Bayreuth, Universitätsstraße 30, 95440 Bayreuth, Germany; christoph.klumpen@uni-bayreuth.de

<sup>2</sup> Chair of Chemical Engineering, University of Bayreuth, Universitätsstraße 30, 95440 Bayreuth, Germany; florian.radakovitsch@uni-bayreuth.de (F.R.); jess@uni-bayreuth.de (A.J.)

\* Correspondence: juergen.senker@uni-bayreuth.de; Tel.: +49-(0)921-552532

## Table of Content

|                                                                      |    |
|----------------------------------------------------------------------|----|
| <b>1. General Information</b> .....                                  | 2  |
| <b>1.1 Literature on Benzimidazole linked Polymers (BILPs)</b> ..... | 2  |
| <b>2. Characterization</b> .....                                     | 4  |
| <b>2.1 Infrared Spectroscopy (IR)</b> .....                          | 4  |
| <b>2.2 Powder X-ray diffraction (PXRD)</b> .....                     | 4  |
| <b>2.3 Thermogravimetric analysis (TGA)</b> .....                    | 5  |
| <b>2.4 Scanning Electron Microscopy (SEM)</b> .....                  | 6  |
| <b>2.5 Nuclear Magnetic Resonance (NMR)</b> .....                    | 7  |
| <b>2.6 Surface area and porosity</b> .....                           | 7  |
| <b>3. Gas Sorption and Selectivity</b> .....                         | 8  |
| <b>3.1 Carbon dioxide</b> .....                                      | 8  |
| 3.1.1 <i>Isosteric heat of adsorption</i> .....                      | 8  |
| 3.1.1 <i>CO<sub>2</sub> Henry</i> .....                              | 9  |
| 3.1.2 <i>CO<sub>2</sub> IAST</i> .....                               | 10 |
| <b>3.2 Nitrogen</b> .....                                            | 11 |
| 3.2.1 <i>Adsorption</i> .....                                        | 11 |
| 3.2.2 <i>N<sub>2</sub> Henry</i> .....                               | 12 |
| 3.2.3 <i>N<sub>2</sub> IAST</i> .....                                | 12 |
| <b>3.3 Methane</b> .....                                             | 13 |
| 3.3.1 <i>Henry</i> .....                                             | 13 |
| 3.3.2 <i>IAST</i> .....                                              | 14 |
| <b>3.4 Argon</b> .....                                               | 16 |
| 3.4.1 <i>T-Plot</i> .....                                            | 16 |
| <b>3.5 Selectivities based on IAST calculations</b> .....            | 16 |
| 3.5.1 <i>Carbon dioxide over nitrogen</i> .....                      | 16 |
| 3.5.2 <i>Carbon dioxide over methane</i> .....                       | 17 |
| <b>4. Literature</b> .....                                           | 18 |

## 1. General Information

### 1.1 Literature on Benzimidazole linked Polymers (BILPs)

Table S1: Key values of literature known porous polybenzimidazoles. For “?” assigned networks no literature could be found.

| Network         | S <sub>A</sub> (BET) / m <sup>2</sup> ·g <sup>-1</sup><br>1 | CO <sub>2</sub> _273K /<br>mmol·g <sup>-1</sup> | CO <sub>2</sub> /N <sub>2</sub> // 273K<br>Henry | CO <sub>2</sub> /CH <sub>4</sub> // 273 K<br>Henry |
|-----------------|-------------------------------------------------------------|-------------------------------------------------|--------------------------------------------------|----------------------------------------------------|
| BILP-1[1]       | 1172 <sup>Ar</sup>                                          | 4.27                                            | 70                                               | 10                                                 |
| BILP-2[2]       | 708 <sup>Ar</sup>                                           | 3.39                                            | 113                                              | 17                                                 |
| BILP-3[3]       | 1306 <sup>Ar</sup>                                          | 5.11                                            | 59                                               | 8                                                  |
| BILP-4[2]       | 1135 <sup>Ar</sup>                                          | 5.34                                            | 79                                               | 10                                                 |
| BILP-5[2]       | 599 <sup>Ar</sup>                                           | 2.91                                            | 95                                               | 10                                                 |
| BILP-6[3]       | 1261 <sup>Ar</sup>                                          | 4.79                                            | 63                                               | 8                                                  |
| BILP-7[2]       | 1122 <sup>Ar</sup>                                          | 4.39                                            | 62                                               | 9                                                  |
| BILP-8?         | -                                                           | -                                               | -                                                | -                                                  |
| BILP-9?         | -                                                           | -                                               | -                                                | -                                                  |
| BILP-10[4]      | 787 <sup>Ar</sup>                                           | 4.02                                            | 111                                              | 14                                                 |
| BILP-11[4]      | 658 <sup>Ar</sup>                                           | 3.09                                            | 103                                              | 11                                                 |
| BILP-12[4]      | 1497 <sup>Ar</sup>                                          | 5.07                                            | 56                                               | 8                                                  |
| BILP-13[4]      | 677 <sup>Ar</sup>                                           | 2.57                                            | 103                                              | 9                                                  |
| BILP-14?        | -                                                           | -                                               | -                                                | -                                                  |
| BILP-15[5]      | 448 <sup>Ar</sup>                                           | 2.68                                            | 83                                               | 9                                                  |
| BILP-16[5]      | 435 <sup>Ar</sup>                                           | 2.70                                            | 53                                               | 10                                                 |
| BILP-15(AC) [5] | 862 <sup>Ar</sup>                                           | 3.43                                            | 61                                               | 9                                                  |
| BILP-16(AC) [5] | 643 <sup>Ar</sup>                                           | 3.45                                            | 49                                               | 9                                                  |
| BILP-17[6]      | 952 <sup>Ar</sup>                                           | -                                               | -                                                | -                                                  |
| BILP-18[6]      | 947 <sup>Ar</sup>                                           | -                                               | -                                                | -                                                  |
| BILP-101[7]     | 536 <sup>N2</sup>                                           | 2.43 <sup>298K</sup>                            | 80                                               | -                                                  |
| PPN-101[8]      | 1096 <sup>N2</sup>                                          | 5.14                                            | 199 IAST                                         | -                                                  |
| TBILP-1[9]      | 330 <sup>Ar</sup>                                           | 117 mg/g                                        | 63                                               | 9                                                  |
| TBILP-2[9]      | 1080 <sup>Ar</sup>                                          | 228 mg/g                                        | 40                                               | 7                                                  |

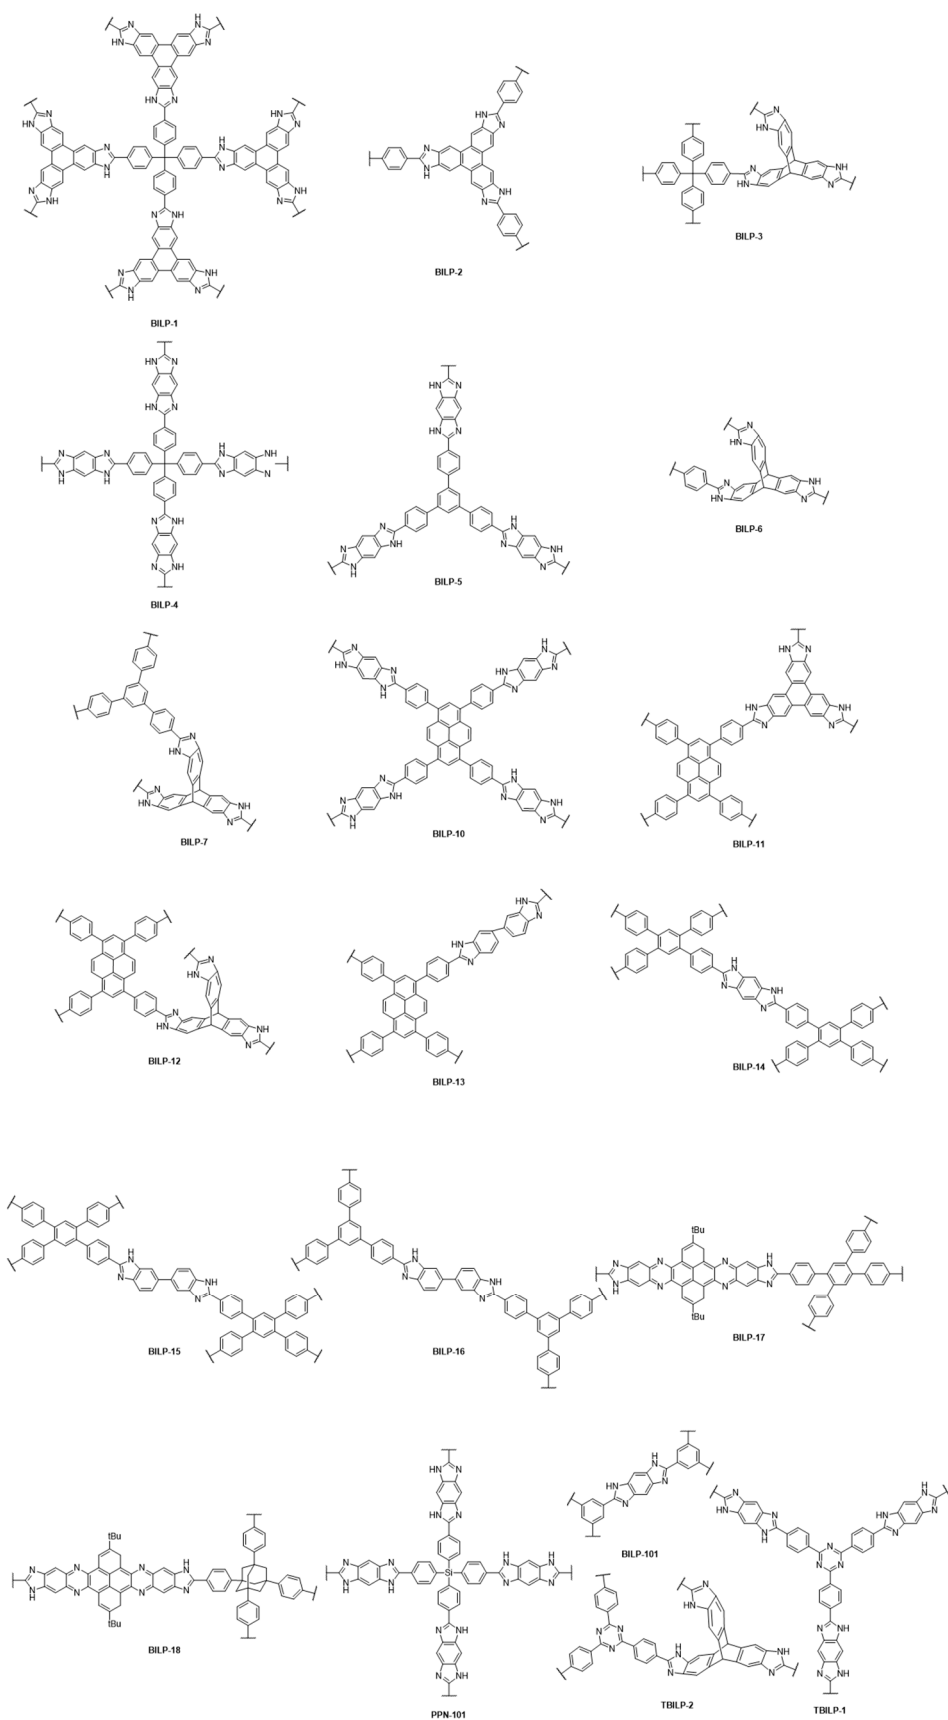

Figure S1: Schematic presentation of the benzimidazole based porous polymers compared in Table S1.

## 2. Characterization

### 2.1 Infrared Spectroscopy (IR)

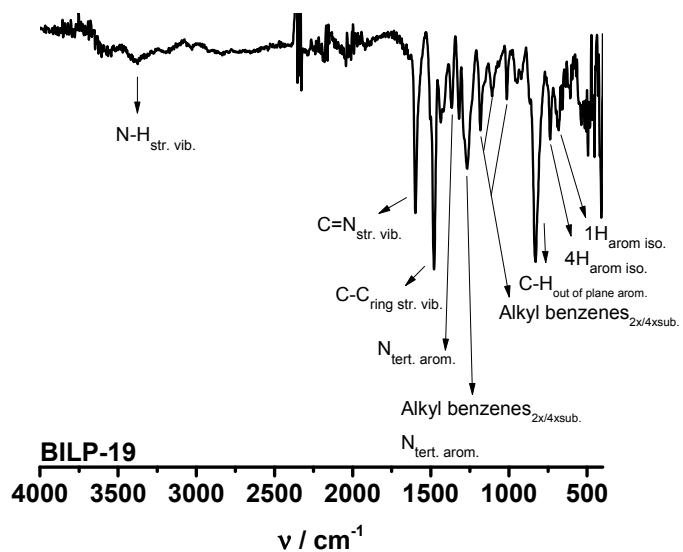

Figure S2: Infrared spectrum of BILP-19 and assignment of the most characteristic signals.

### 2.2 Powder X-ray diffraction (PXRD)

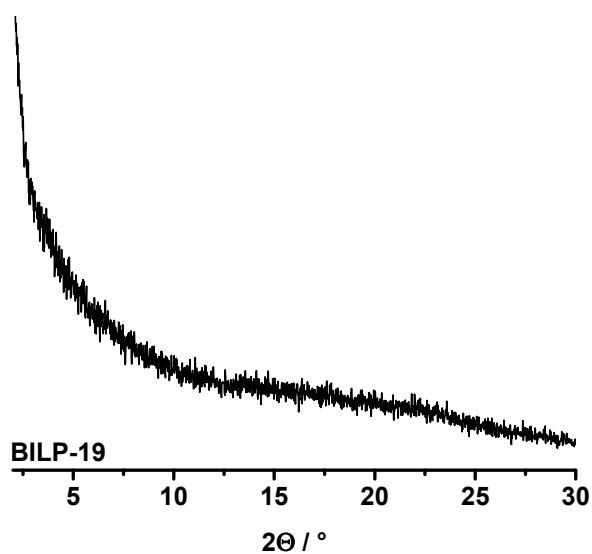

Figure S3: PXRD diffractogram of BILP-19.

### 2.3 Thermogravimetric analysis (TGA)

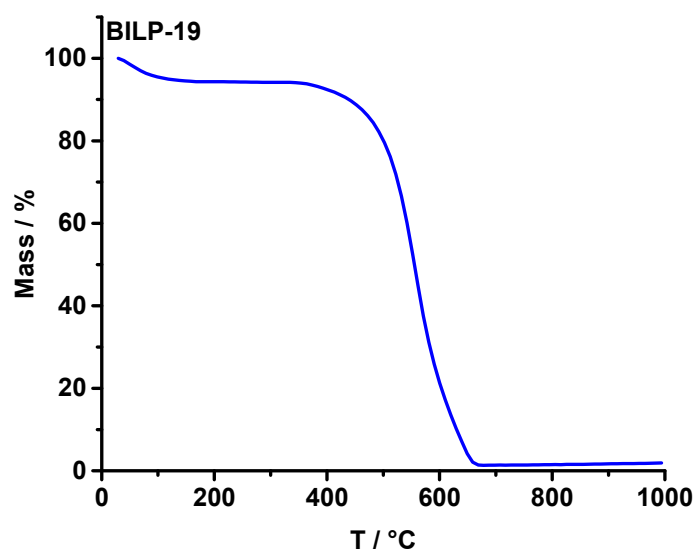

Figure S4: TGA curve of BILP-19 measured under air.

## 2.4 Scanning Electron Microscopy (SEM)

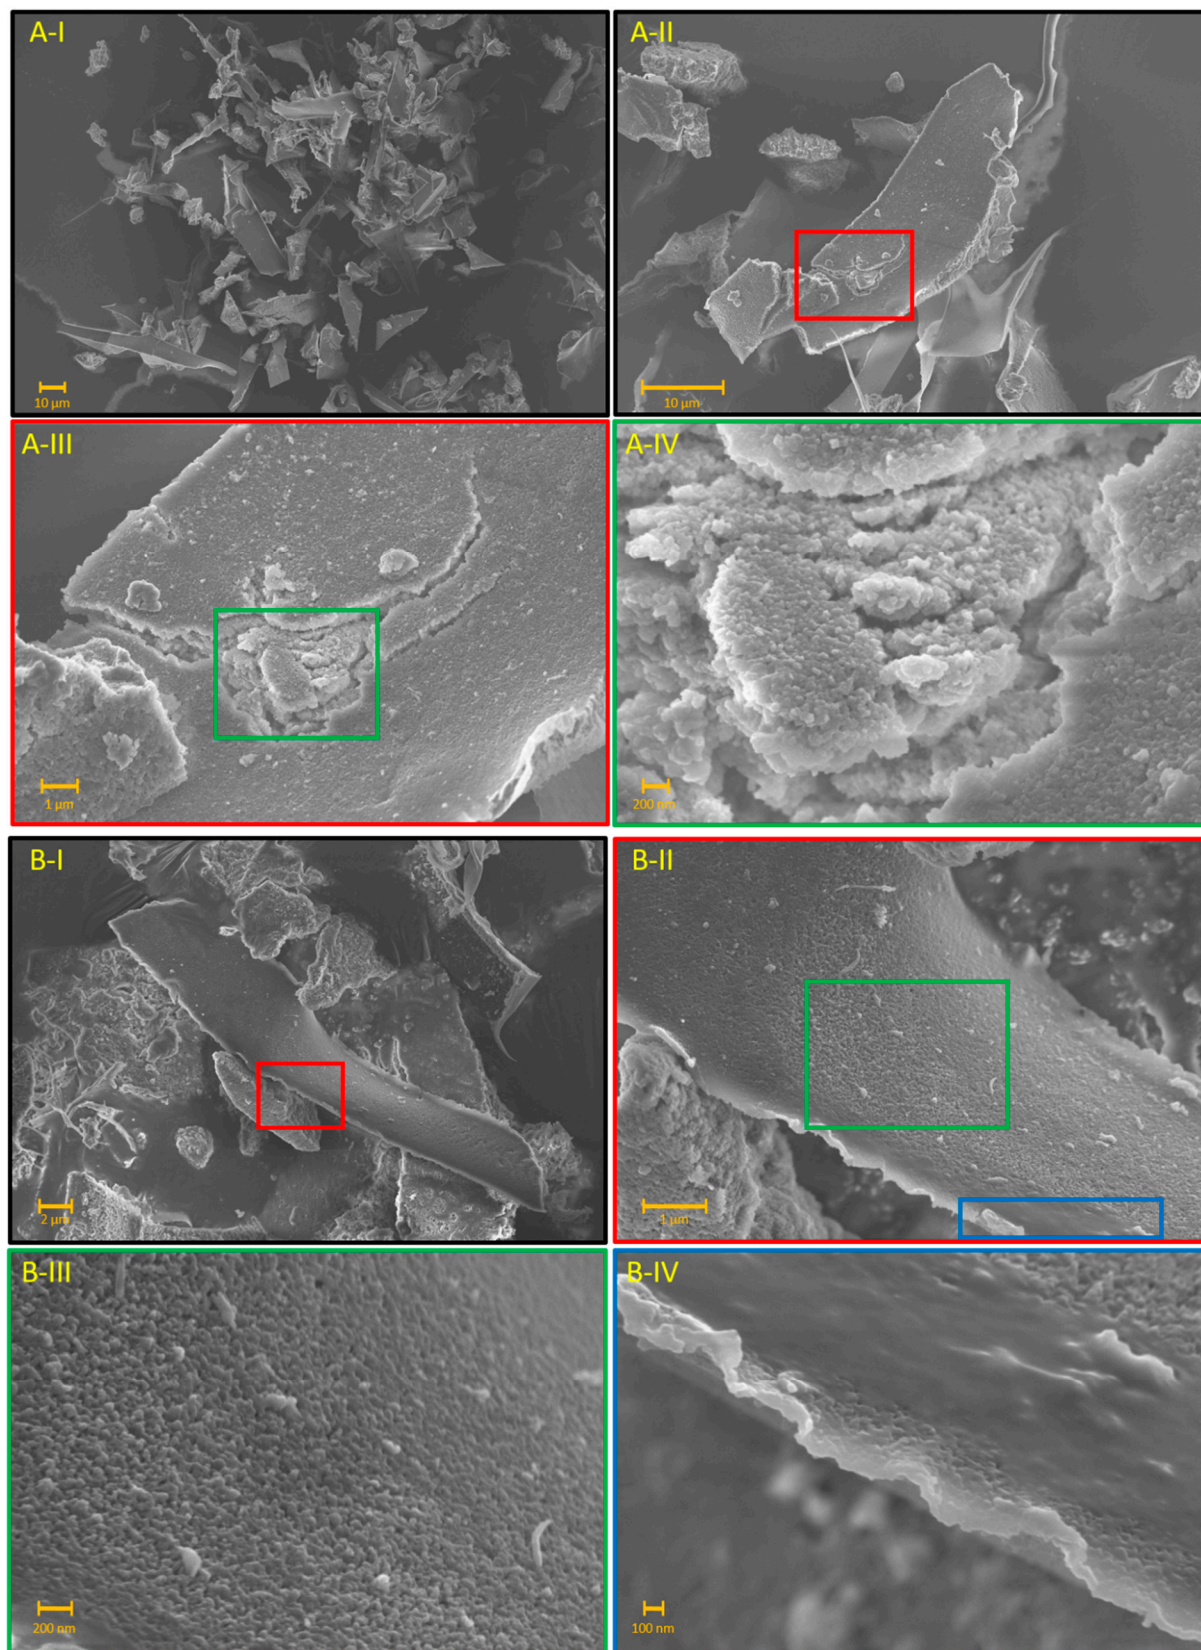

Figure S5: SEM Images of BILP-19, taken at to different positions (A, B).

## 2.5 Nuclear Magnetic Resonance (NMR)

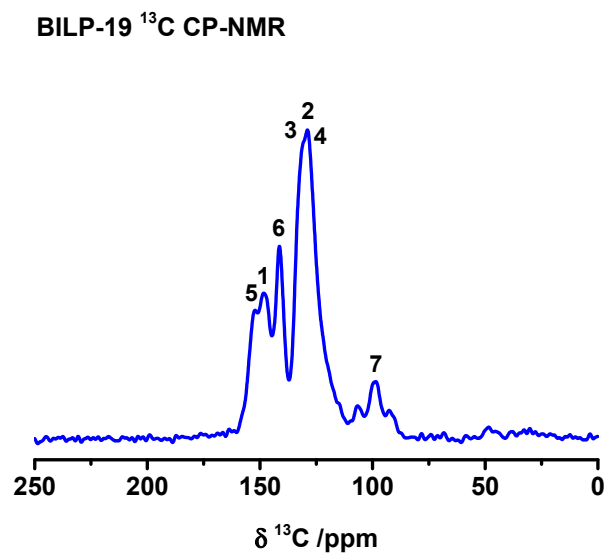

Figure S6: Complete  $^{13}\text{C}$  MAS CP NMR spectrum of BILP-19.

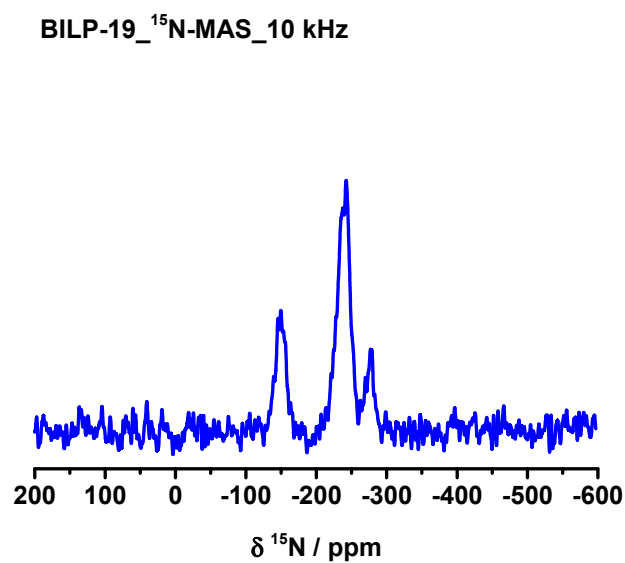

Figure S7: Complete  $^{15}\text{N}$  CP MAS NMR spectrum of BILP-19.

## 2.6 Surface area and porosity

Table S2: Surface area and porosity of BILP-19 estimated from Ar, N<sub>2</sub> and CO<sub>2</sub> sorption isotherms, respectively.

| Adsorbative     | S <sub>A,BET</sub> /<br>m <sup>2</sup> ·g <sup>-1</sup> | S <sub>A,DFT</sub> /<br>m <sup>2</sup> ·g <sup>-1</sup> | P <sub>V,tot.</sub> /<br>cm <sup>3</sup> ·g <sup>-1</sup> | P <sub>V,mic.</sub> /<br>cm <sup>3</sup> ·g <sup>-1</sup> | P <sub>V,mic.</sub> / P <sub>V,tot.</sub> |
|-----------------|---------------------------------------------------------|---------------------------------------------------------|-----------------------------------------------------------|-----------------------------------------------------------|-------------------------------------------|
| Ar              | 144                                                     | 128                                                     | 0.0232                                                    | 0.013                                                     | 0.04                                      |
| N <sub>2</sub>  | 252                                                     | 227                                                     | 0.382                                                     | 0.035                                                     | 0.09                                      |
| CO <sub>2</sub> | -                                                       | 1325                                                    | 0.442                                                     | -                                                         | -                                         |

## 2.7 CHN analysis

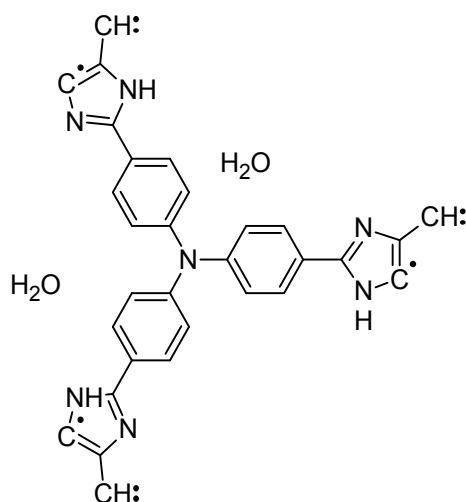

Table S3: Results of CHN analysis of BILP-19. Due to water content of 6 %, obtained by thermogravimetric analysis, two water molecules per linker were included in the theoretical calculations.

|                                                | C / % | H / % | N / % |
|------------------------------------------------|-------|-------|-------|
| <b>BILP-19·2H<sub>2</sub>O<sub>meas.</sub></b> | 65.67 | 4.24  | 17.94 |
| <b>BILP-19·2H<sub>2</sub>O<sub>calc.</sub></b> | 70.30 | 4.33  | 19.13 |
| <b>Deviation</b>                               | 4.63  | 0.09  | 1.19  |

## 3. Gas Sorption and Selectivity

### 3.1 Carbon dioxide

#### 3.1.1 Isotheric heat of adsorption

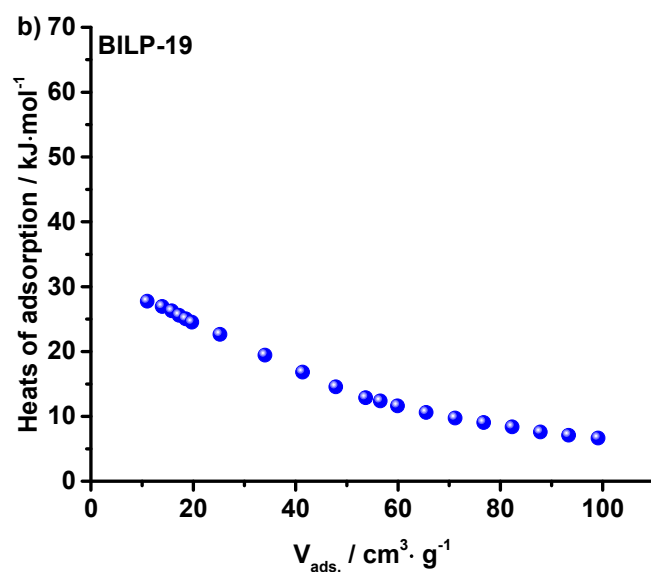

Figure S8: Isotheric heats of adsorption calculated from carbon dioxide adsorption isotherms measured at 273 K, 298 K and 313 K.



### 3.1.1 CO<sub>2</sub>\_Henry

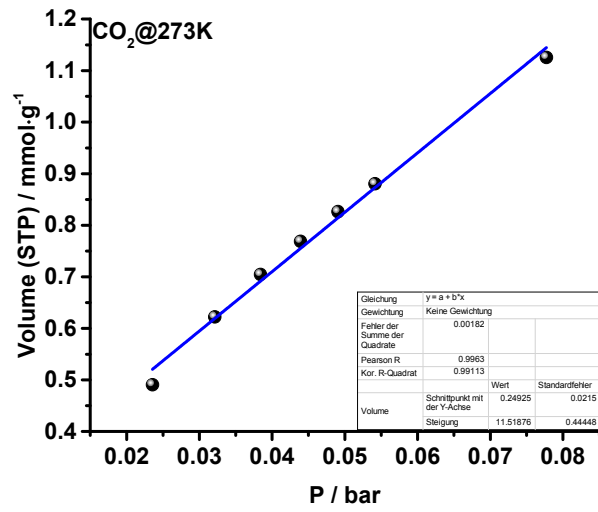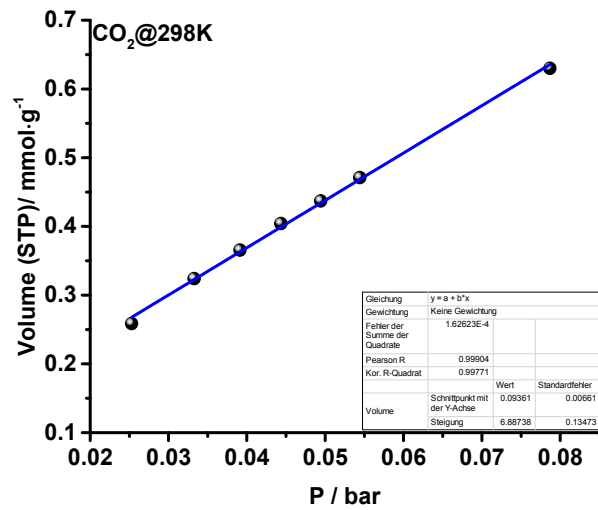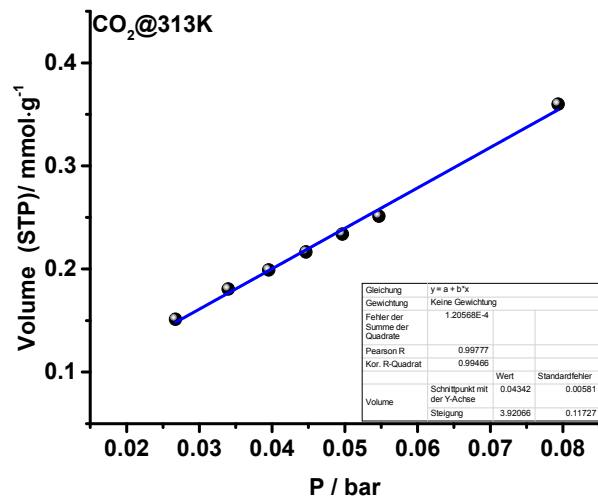

Figure S9: Fits for initial slope calculations (Henry method) of CO<sub>2</sub> isotherms measured at 273, 298 and 313 K.

### 3.1.2 CO<sub>2</sub>\_IAST

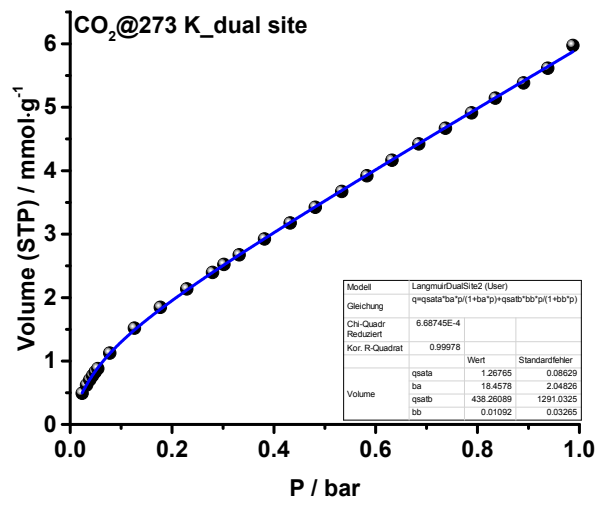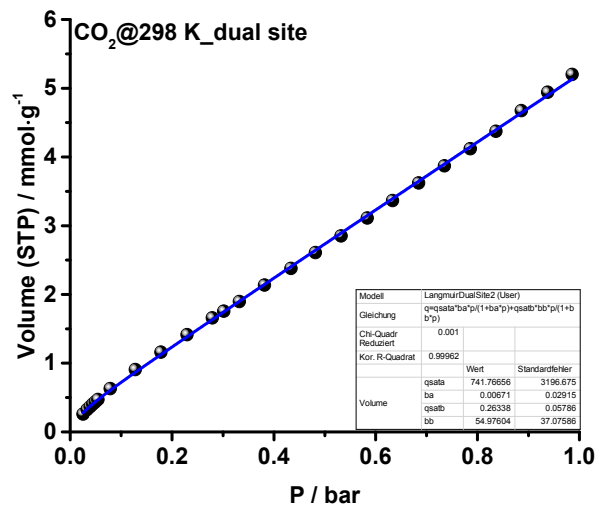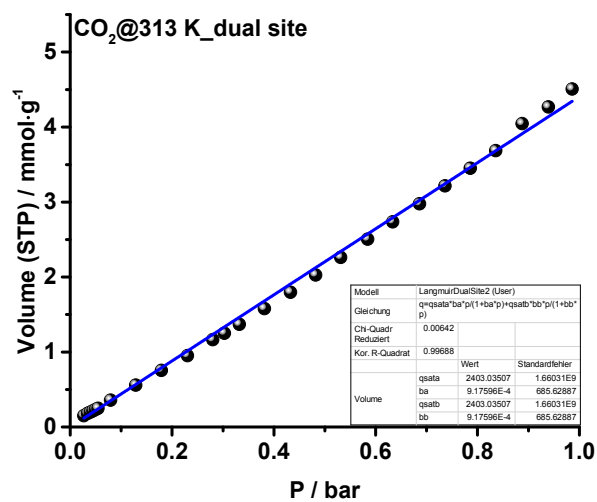

Figure S10: Langmuir dual site fits for CO<sub>2</sub> adsorption isotherms measured at 273, 298 and 313 K.

## 3.2 Nitrogen

### 3.2.1 Adsorption

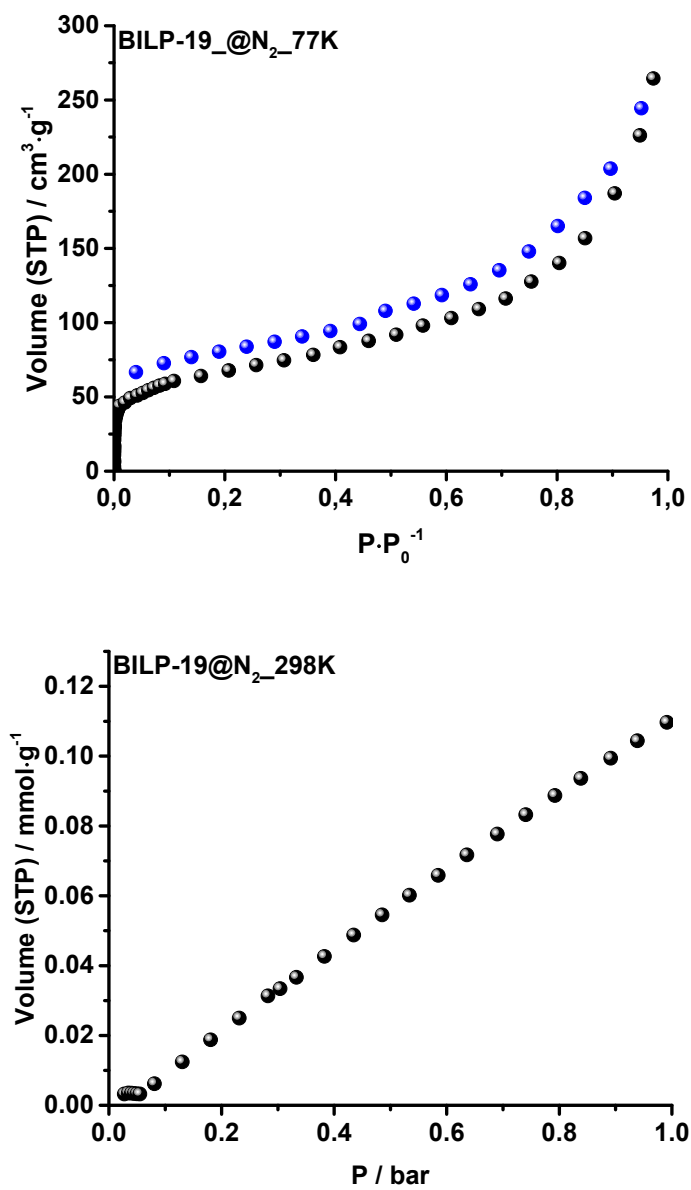

Figure S11: Nitrogen adsorption isotherm measured at 77K (top) and 298 K (bottom).

### 3.2.2 N<sub>2</sub> Henry

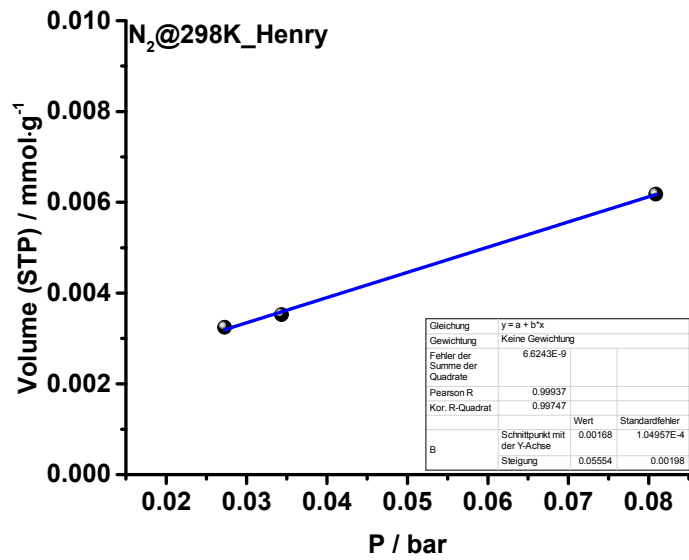

Figure S12: Initial slope of pure component fit for nitrogen adsorption at 298 K.

### 3.2.3 N<sub>2</sub> IAST

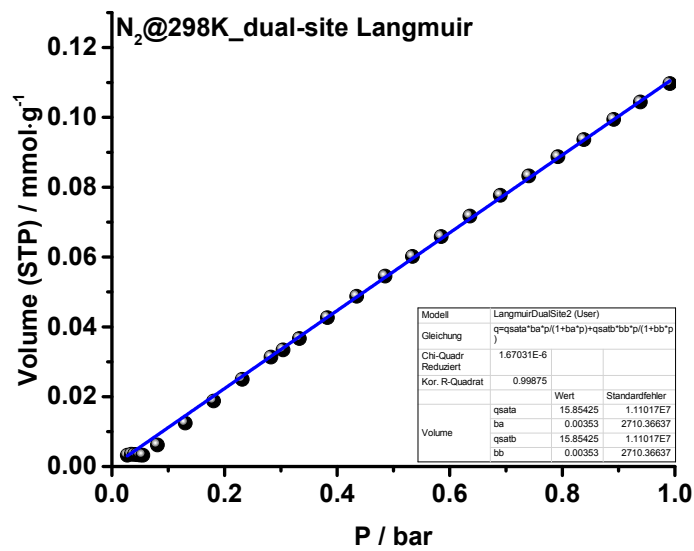

Figure S13: Langmuir dual site fit of N<sub>2</sub> sorption isotherms measured at 298 K.

### 3.3 Methane

#### 3.3.1 Henry

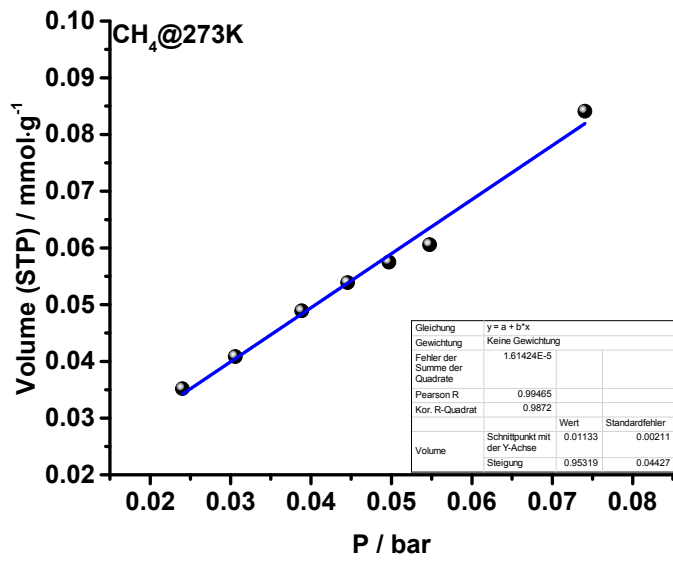

Figure S14: Initial slope of pure component adsorption fit for CH<sub>4</sub>, measured at 273 K.

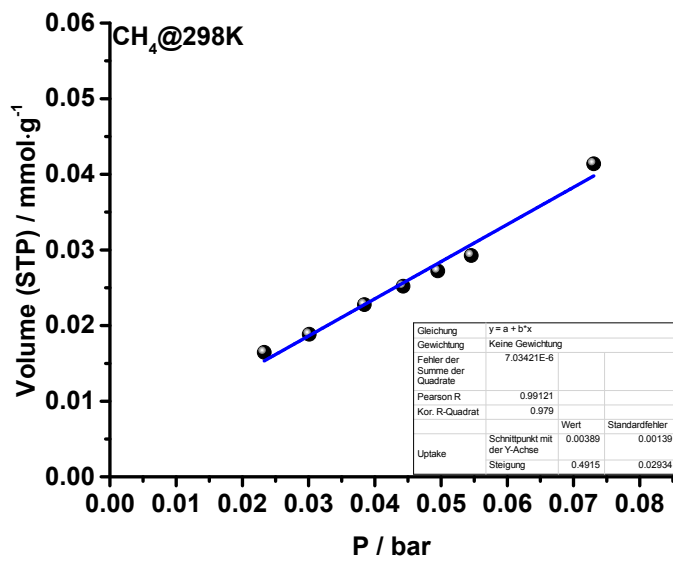

Figure S15: Initial slope of pure component adsorption fit for CH<sub>4</sub>, measured at 298 K.

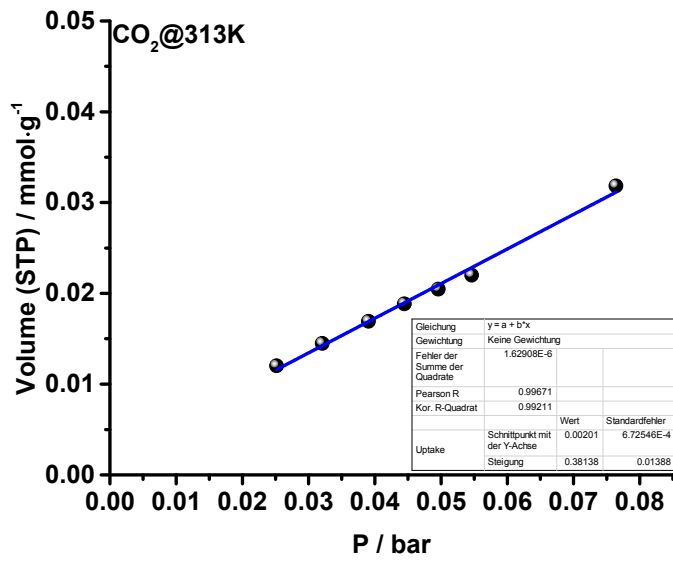

Figure S16: Initial slope of pure component adsorption fit for CH<sub>4</sub>, measured at 313 K.

### 3.3.2 IAST

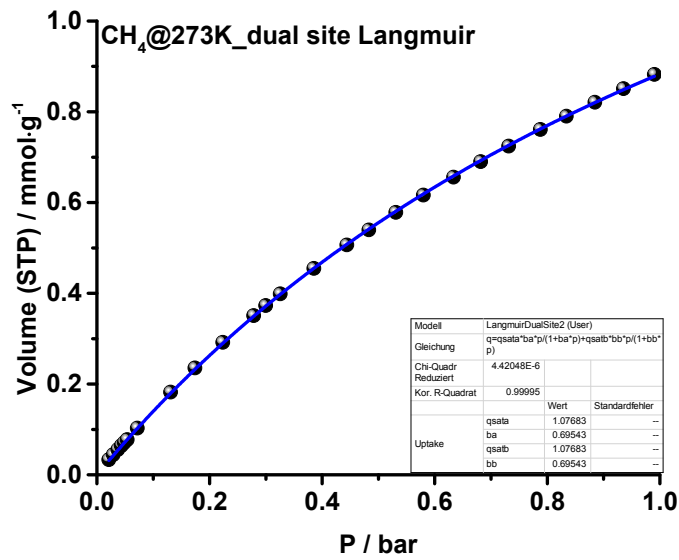

Figure S17: Langmuir dual site fit of CH<sub>4</sub> sorption isotherms measured at 298 K.

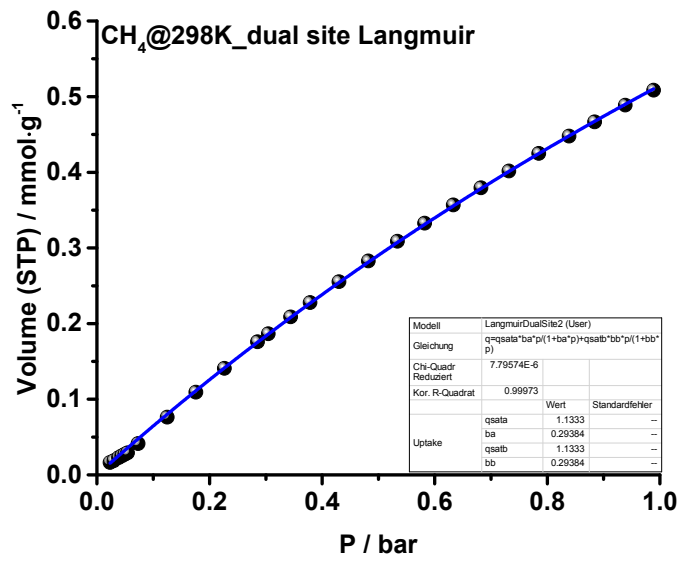

Figure S18: Langmuir dual site fit of CH<sub>4</sub> sorption isotherms measured at 298 K.

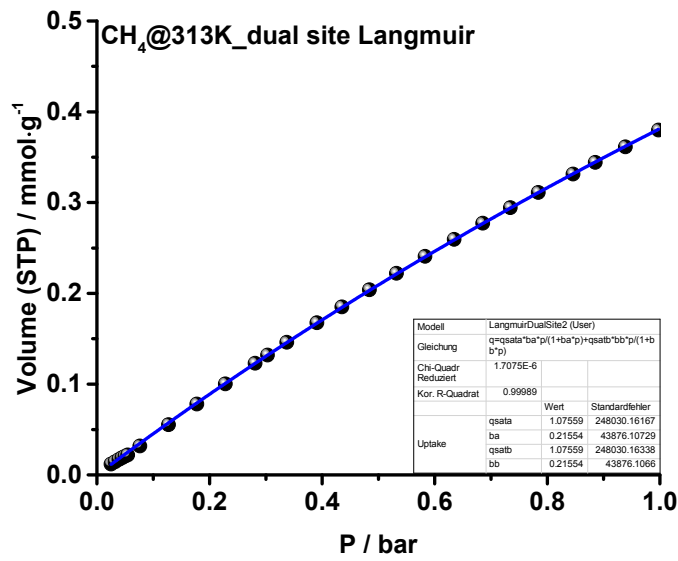

Figure S19: Langmuir dual site fit of CH<sub>4</sub> sorption isotherms measured at 313 K.

### 3.4 Argon

#### 3.4.1 T-Plot

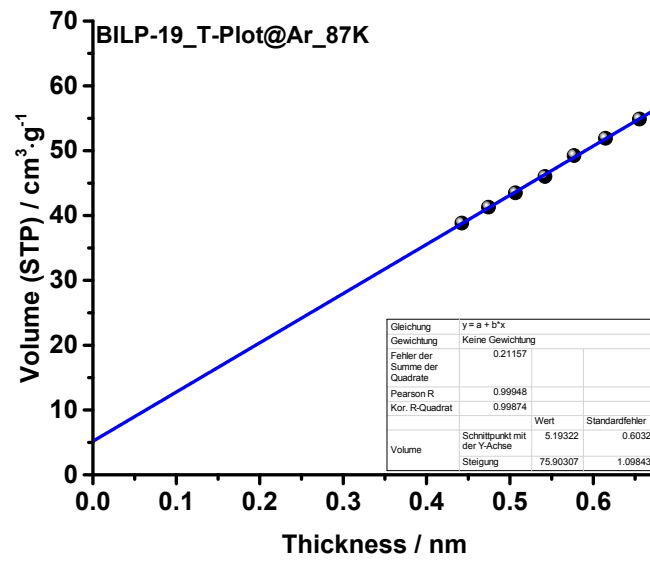

Figure S20: T-Plot applied on Ar isotherm measured at 87 K. The P/P0 range was 0.2 - 0.5.

### 3.5 Selectivities based on IAST calculations

#### 3.5.1 Carbon dioxide over nitrogen

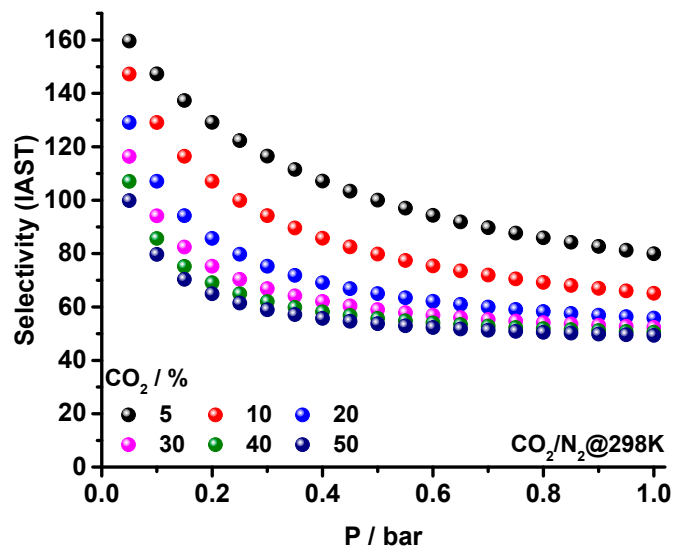

Figure S21: Selectivities of carbon dioxide over nitrogen, based on IAST calculations for different contents of carbon dioxide at 298 K.



3.5.2 Carbon dioxide over methane

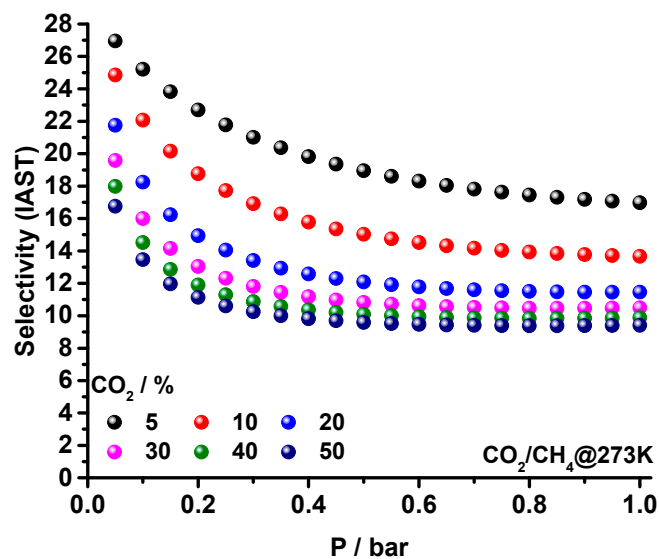

Figure S22: Selectivities of carbon dioxide over methane, based on IAST calculations for different contents of carbon dioxide at 273 K.

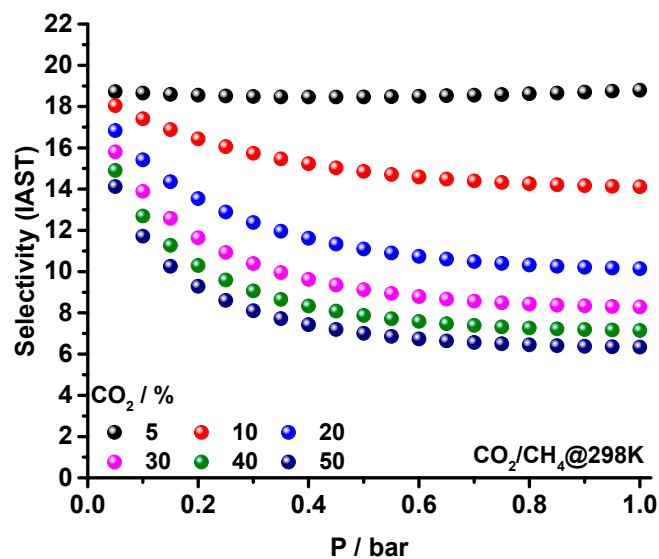

Figure S23: Selectivities of carbon dioxide over methane, based on IAST calculations for different contents of carbon dioxide at 298 K.

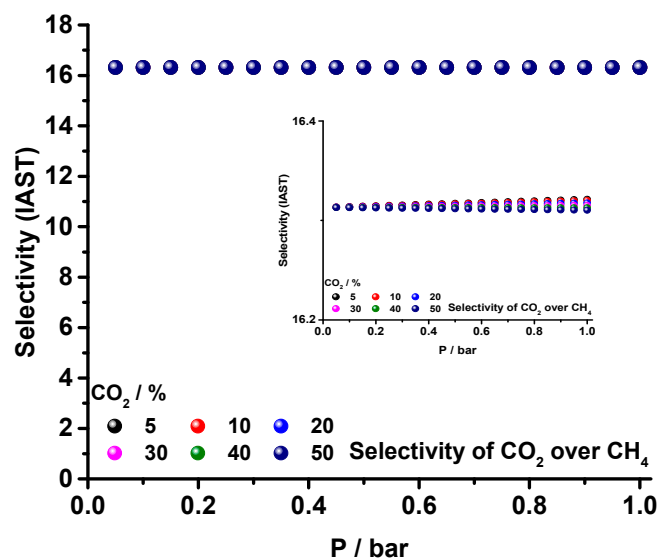

Figure S24: Selectivities of carbon dioxide over methane, based on IAST calculations for different contents of carbon dioxide at 313 K.

#### 4. Literature

- Rabbani, M. G.; El-Kaderi, H. M. Template-Free Synthesis of a Highly Porous Benzimidazole-Linked Polymer for CO<sub>2</sub> Capture and H<sub>2</sub> Storage. *Chem. Mater.* **2011**, *23*, 1650–1653.
- Rabbani, M. G.; El-Kaderi, H. M. Synthesis and Characterization of Porous Benzimidazole-Linked Polymers and Their Performance in Small Gas Storage and Selective Uptake. *Chem. Mater.* **2012**, *24*, 1511–1517.
- Rabbani, M. G.; Reich, T. E.; Kassab, R. M.; Jackson, K. T.; El-Kaderi, H. M. High CO<sub>2</sub> uptake and selectivity by triptycene-derived benzimidazole-linked polymers. *Chem. Commun.* **2012**, *48*, 1141–1143.
- Sekizkardes, A. K.; İslamoğlu, T.; Kahveci, Z.; El-Kaderi, H. M. Application of pyrene-derived benzimidazole-linked polymers to CO<sub>2</sub> separation under pressure and vacuum swing adsorption settings. *J. Mater. Chem. A* **2014**, *2*, 12492.
- Altarawneh, S.; İslamoğlu, T.; Sekizkardes, A. K.; El-Kaderi, H. M. Effect of Acid-Catalyzed Formation Rates of Benzimidazole-Linked Polymers on Porosity and Selective CO<sub>2</sub> Capture from Gas Mixtures. *Environ. Sci. Technol.* **2015**, *49*, 4715–4723.
- Altarawneh, S.; Nahar, L.; Arachchige, I. U.; El-Ballouli, A. O.; Hallal, K. M.; Kaafarani, B. R.; Rabbani, M. G.; Arvapally, R. K.; El-Kaderi, H. M. Highly porous and photoluminescent pyrene-quinoxaline-derived benzimidazole-linked polymers. *J. Mater. Chem. A* **2015**, *3*, 3006–3010.
- Sekizkardes, A. K.; Culp, J. T.; Islamoglu, T.; Marti, A.; Hopkinson, D.; Myers, C.; El-Kaderi, H. M.; Nulwala, H. B. An ultra-microporous organic polymer for high performance carbon dioxide capture and separation. *Chem. Commun. Chem. Commun* **2015**, *51*, 13393–13396.
- Zhang, M.; Perry, Z.; Park, J.; Zhou, H.-C. Stable benzimidazole-incorporated porous polymer network for carbon capture with high efficiency and low cost. *Polymer (Guildf)*. **2014**, *55*, 335–339.
- Sekizkardes, A. K.; Altarawneh, S.; Kahveci, Z.; Islamoğlu, T.; El-Kaderi, H. M. Highly selective CO<sub>2</sub> capture by triazine-based benzimidazole-linked polymers. *Macromolecules* **2014**, *47*, 8328–8334.
